# Supplementary material
Source: PubMed Central journal article supplement (PMC3900234)

## **B Cell-Specific Loss of Lyn Kinase Leads to Autoimmunity**

Chrystelle Lamagna<sup>\*</sup>, Yongmei Hu<sup>\*</sup>, Anthony L. DeFranco<sup>†</sup> and Clifford A. Lowell<sup>\*, 2</sup>

<sup>\*</sup> Departments of Laboratory Medicine and <sup>†</sup> Microbiology and Immunology, University of California, San Francisco, CA, 94143 USA

<sup>1</sup> This work was supported by the National Institutes of Health (AI65495 and AI68150 to C.A.L.; AI078869 to A.L.D).

<sup>2</sup> Address correspondence to Dr Clifford A. Lowell, University of California at San Francisco, Department of Laboratory Medicine, 513 Parnassus Avenue, Box 0451, San Francisco, CA 94143, USA. E-mail: clifford.lowell@ucsf.edu  
Tel: 415-4762963; Fax: 415-5025462

<sup>3</sup> Abbreviations used in this paper: SFK, Src family kinase;  $[Ca^{2+}]_i$ , intracellular  $Ca^{2+}$  concentration; T1, transitional stage 1; T2, transitional stage 2; T3, transitional stage 3; Fol., Follicular; MZ, marginal zone; GC, germinal center; Ig, immunoglobulins

**Running title: B cell-specific Lyn deletion causes autoimmunity**

## Supplemental Materials

### Figure S1: Generation of B cell-specific Lyn-deficient mice.

(A) Representative dot plots showing Lyn protein expression levels determined by intracellular flow cytometry analysis of peripheral blood leukocytes of the indicated lineages (2 month-old mice).

(B) Percentage of Lyn<sup>+</sup> cells in the indicated peripheral blood populations of 2 month-old mice. Data represent mean  $\pm$  SEM of independent experiments from 5-8 mice per group. \*\*  $P \leq 0.01$ , \*\*\*  $P \leq 0.001$  (One-way ANOVA).

### Figure S2: Representative labeling and gating strategies used to analyze FACS data and define the different B cell subpopulations in the spleen.

Representative dot plots from spleen of 2 month-old WT mice. The numbers in gates represent the frequency of gated cells. Cells were first defined as DAPI<sup>-</sup> and PerCP-Cy5.5<sup>-</sup> population, PerCP-Cy5.5 being used to exclude CD11b<sup>+</sup> and TCR $\beta$ <sup>+</sup> cells. Subsequent gating allowed the identification of the following strategies B cell populations.

(A) Plasma cells were identified as B220<sup>lo/-</sup> CD138<sup>hi</sup> cells.

(B) Gating on the B220<sup>+</sup> IgD<sup>-</sup> population, followed by subsequent gating on Fas<sup>+</sup> GL7<sup>+</sup> cells allowed the identification of GC B cells.

(C) Gating strategies used to identify transitional T1, T2 and T3 cells, as well as mature follicular (I and II) and MZ B cells. The different subsets were defined as follow:

T1: CD19<sup>+</sup> IgD<sup>lo</sup> IgM<sup>hi</sup> CD93<sup>+</sup> CD23<sup>-</sup> CD21<sup>-</sup>

T2: CD19<sup>+</sup> IgD<sup>lo</sup> IgM<sup>hi</sup> CD93<sup>+</sup> CD23<sup>+</sup> CD21<sup>-</sup>

T3: CD19<sup>+</sup> IgD<sup>hi</sup> IgM<sup>lo</sup> CD93<sup>+</sup> CD23<sup>+</sup> CD21<sup>lo</sup>

MZ: CD19<sup>+</sup> IgD<sup>lo</sup> IgM<sup>hi</sup> CD93<sup>-</sup> CD23<sup>-</sup> CD21<sup>+</sup>

Fol. I: CD19<sup>+</sup> IgD<sup>hi</sup> IgM<sup>lo</sup> CD93<sup>-</sup> CD21<sup>lo</sup>

Fol. II: CD19<sup>+</sup> IgD<sup>hi</sup> IgM<sup>hi</sup> CD93<sup>lo/-</sup> CD21<sup>lo</sup>

**Figure S3: *Lyn*<sup>-/-</sup> and *B-lyn*<sup>-/-</sup> display altered architecture of the lymphoid tissues**

H&E staining of spleen (upper panel) and lymph node (lower panel) sections from 8 month-old control, *lyn*<sup>-/-</sup> and *B-lyn*<sup>-/-</sup> mice. Representative pictures are shown. Scale bars represent 200 μm.

Figure S1 - Lamagna C. *et al.*

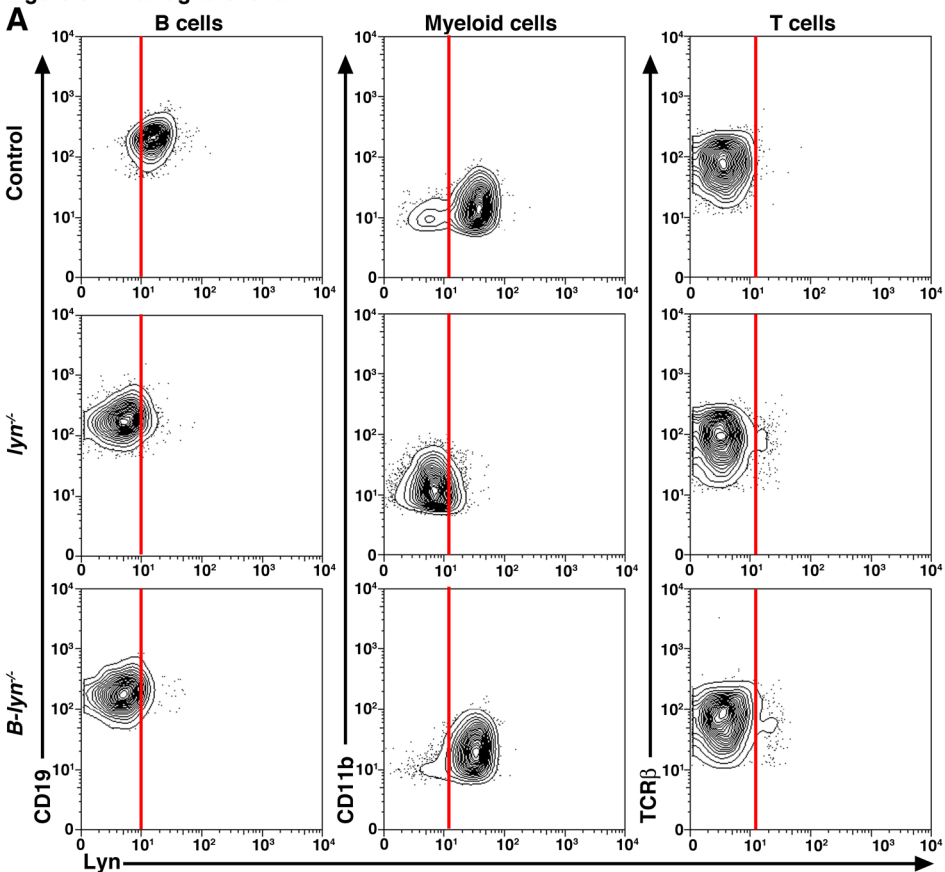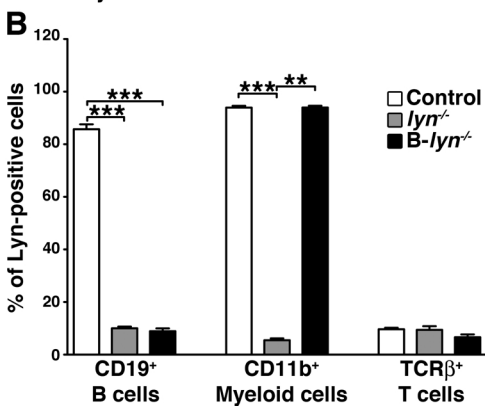

Figure S2 - Lamagna C. *et al.*

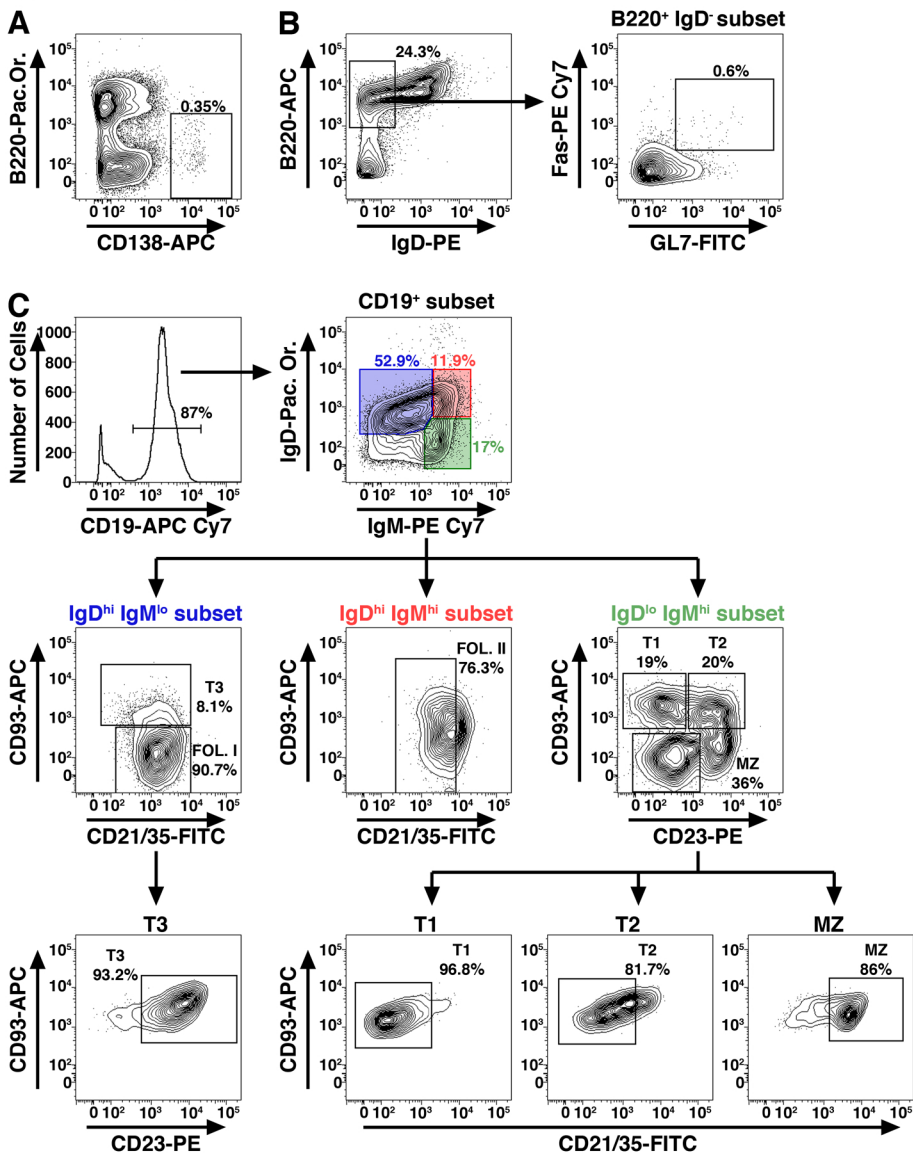

Figure S3 - Lamagna C. *et al.*

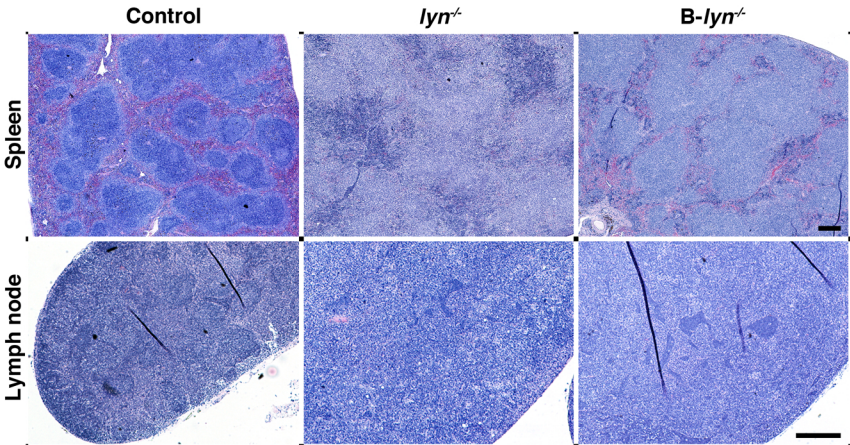

Supplement: NIHMS545374-supplement-1.pdf [file NIHMS545374-supplement-1.pdf]
